# Supplementary material
Source: MDPI journal article supplement (https://www.mdpi.com/2073-4344/9/3/269)

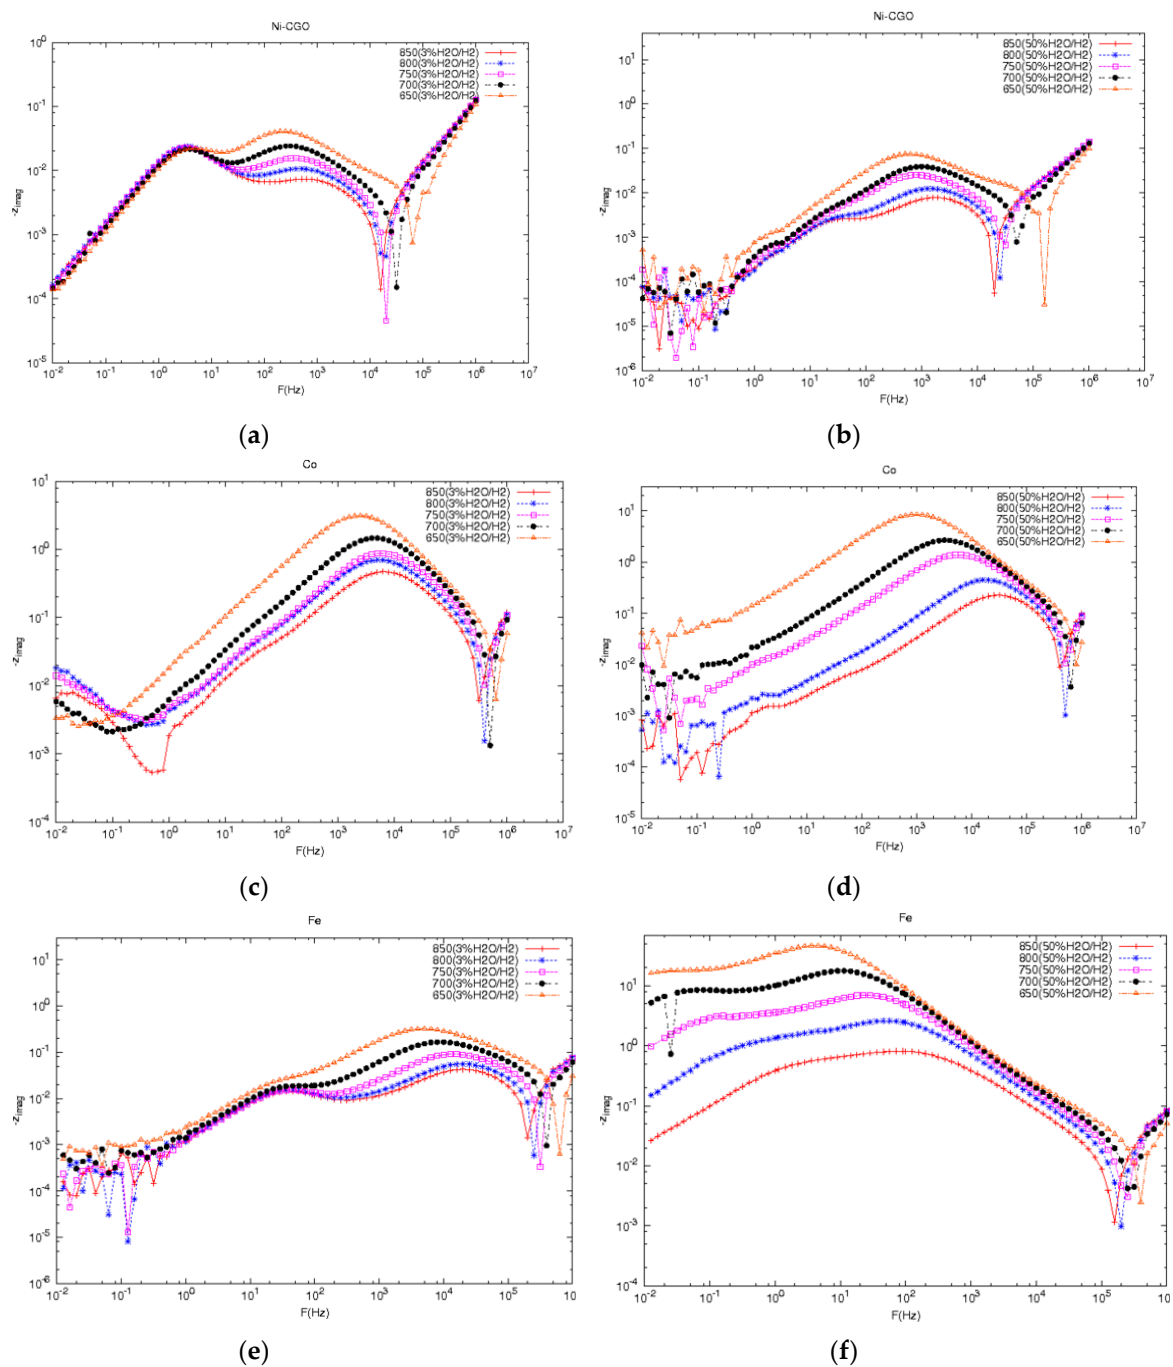

**Figure S2.** Bode plots of Ni-CGO- (a,b), Co- (c,d), and Fe- (e,f) infiltrated LSCZ5 at different operating temperatures in 3% H<sub>2</sub>O/H<sub>2</sub> and 50% H<sub>2</sub>O/ H<sub>2</sub>.

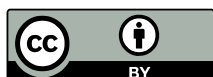

Supplement: s1 [file s1]
